# Supplementary material
Source: publisher site journal article supplement (https://www.dovepress.com/article/341001)
Supplement: Supplementary file 1 [file get_supplementary_file.php]

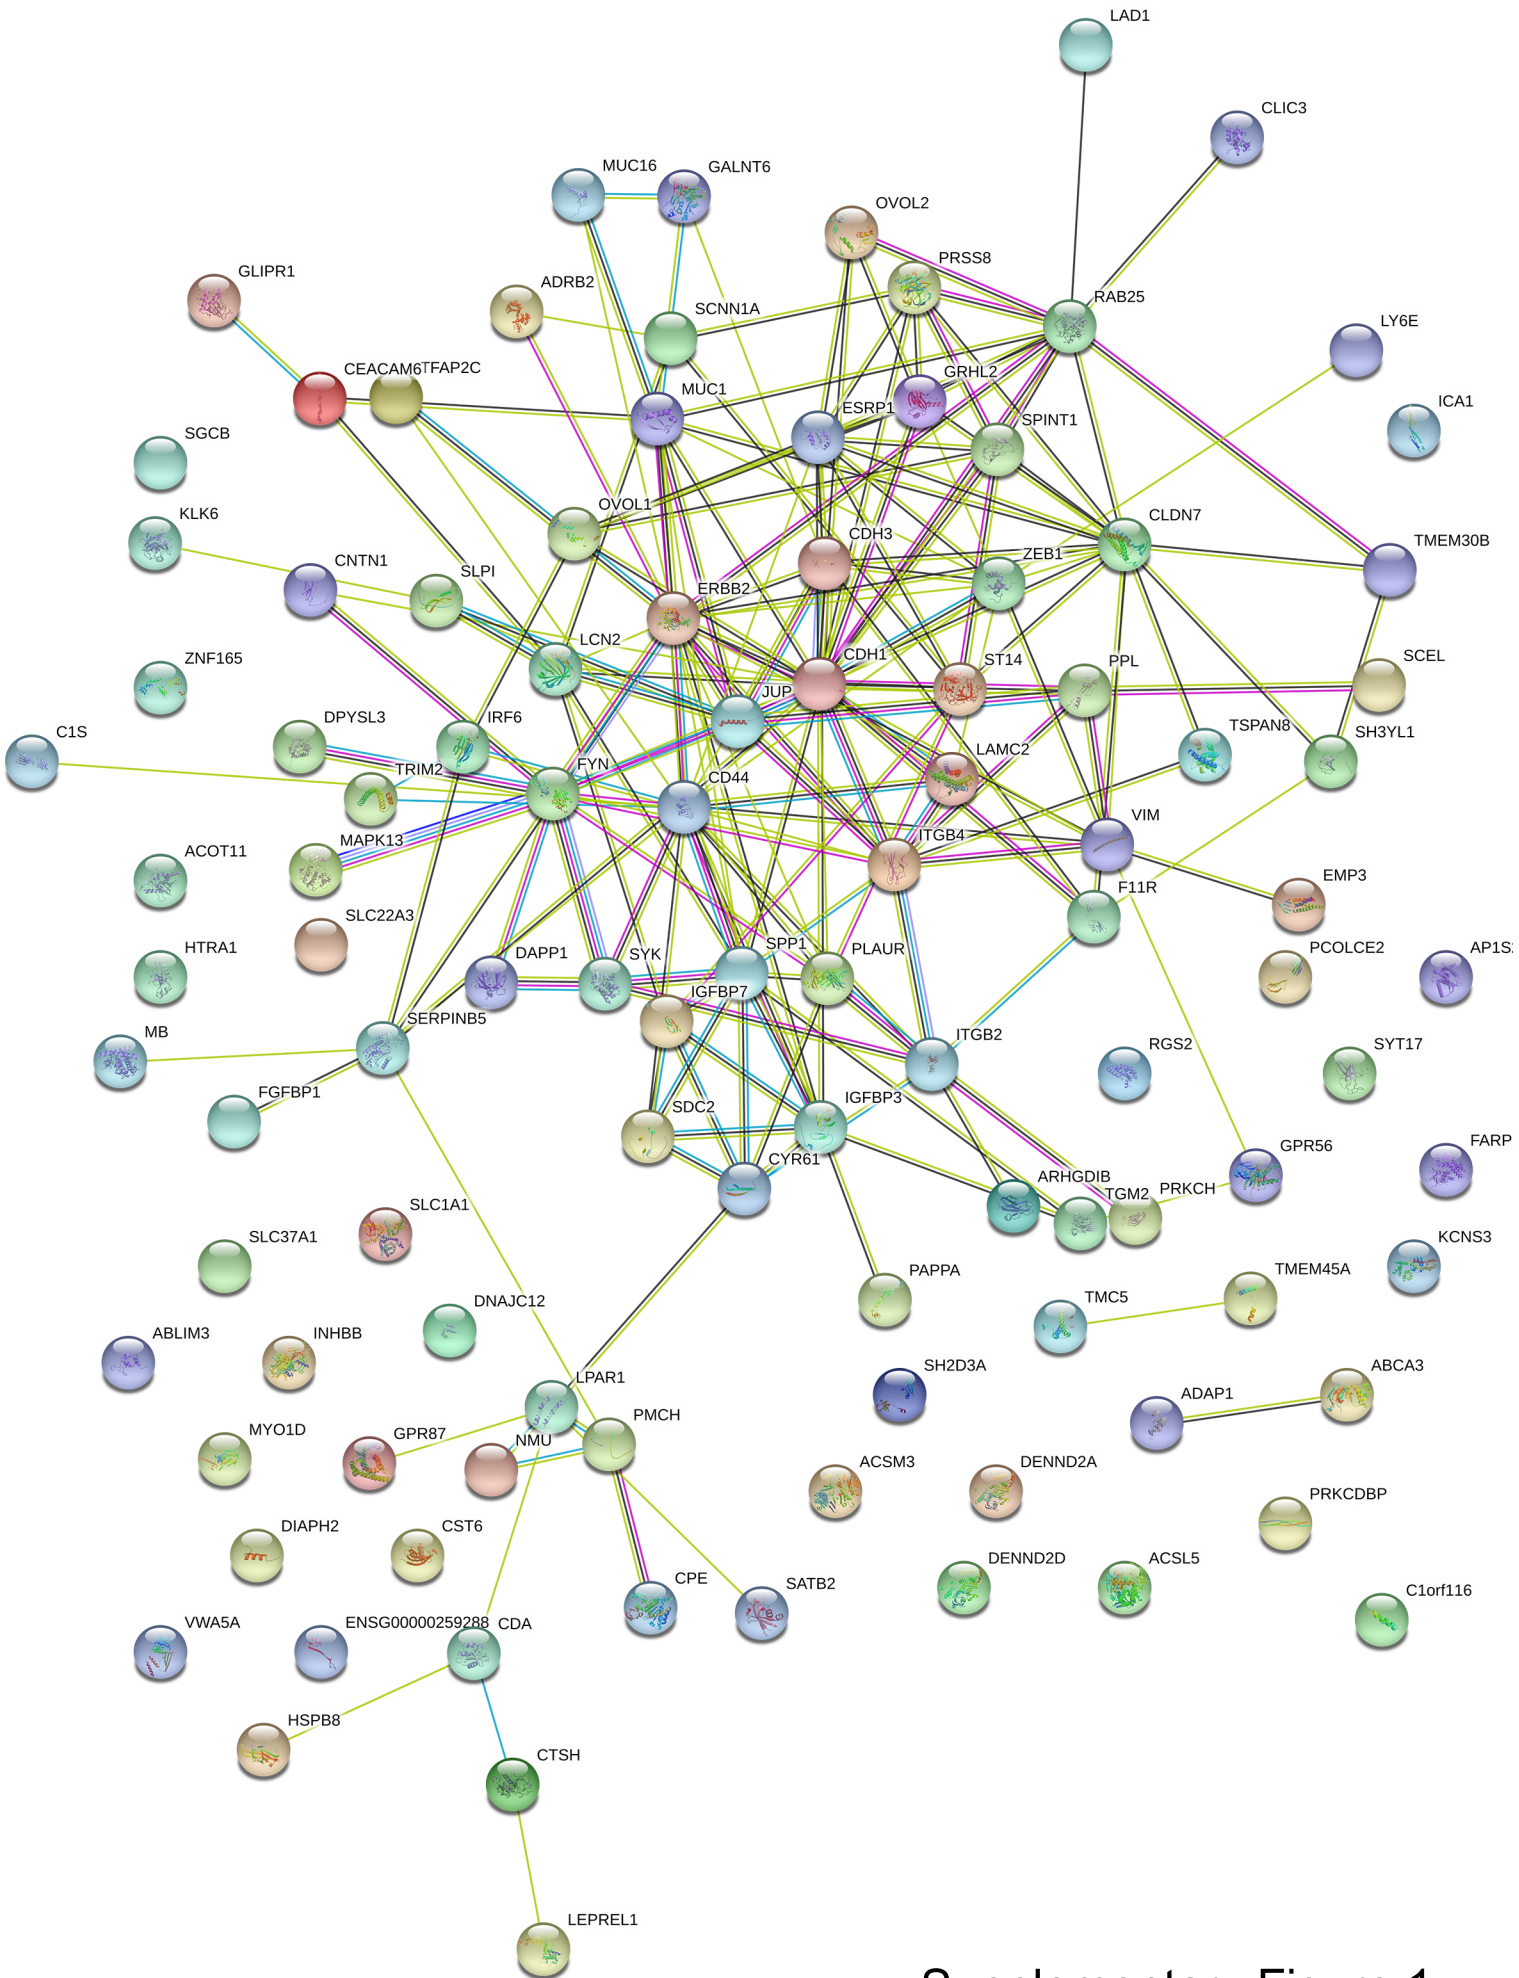

Supplementary Figure 1

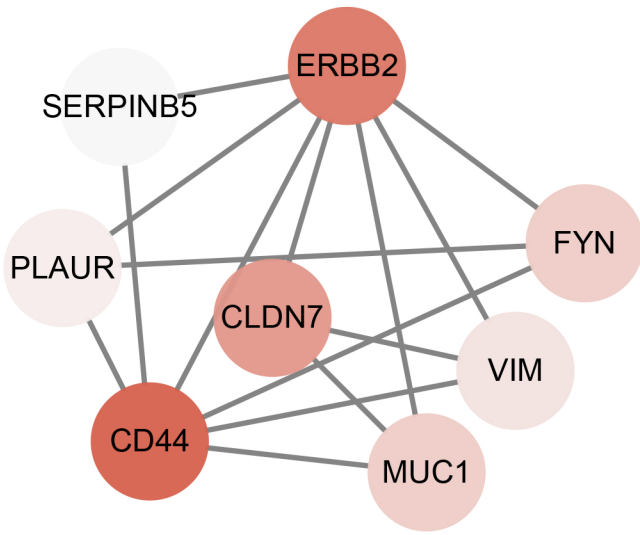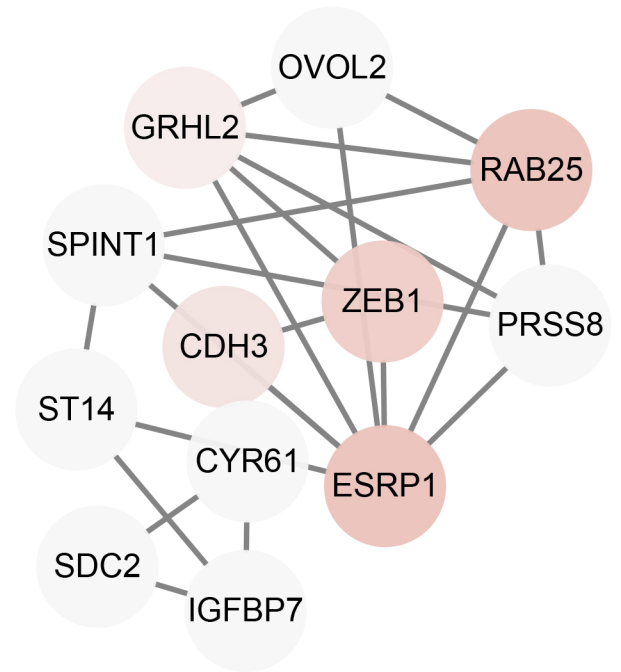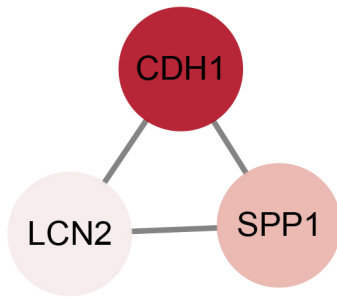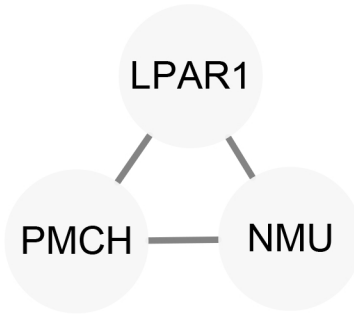

Supplementary Figure 2

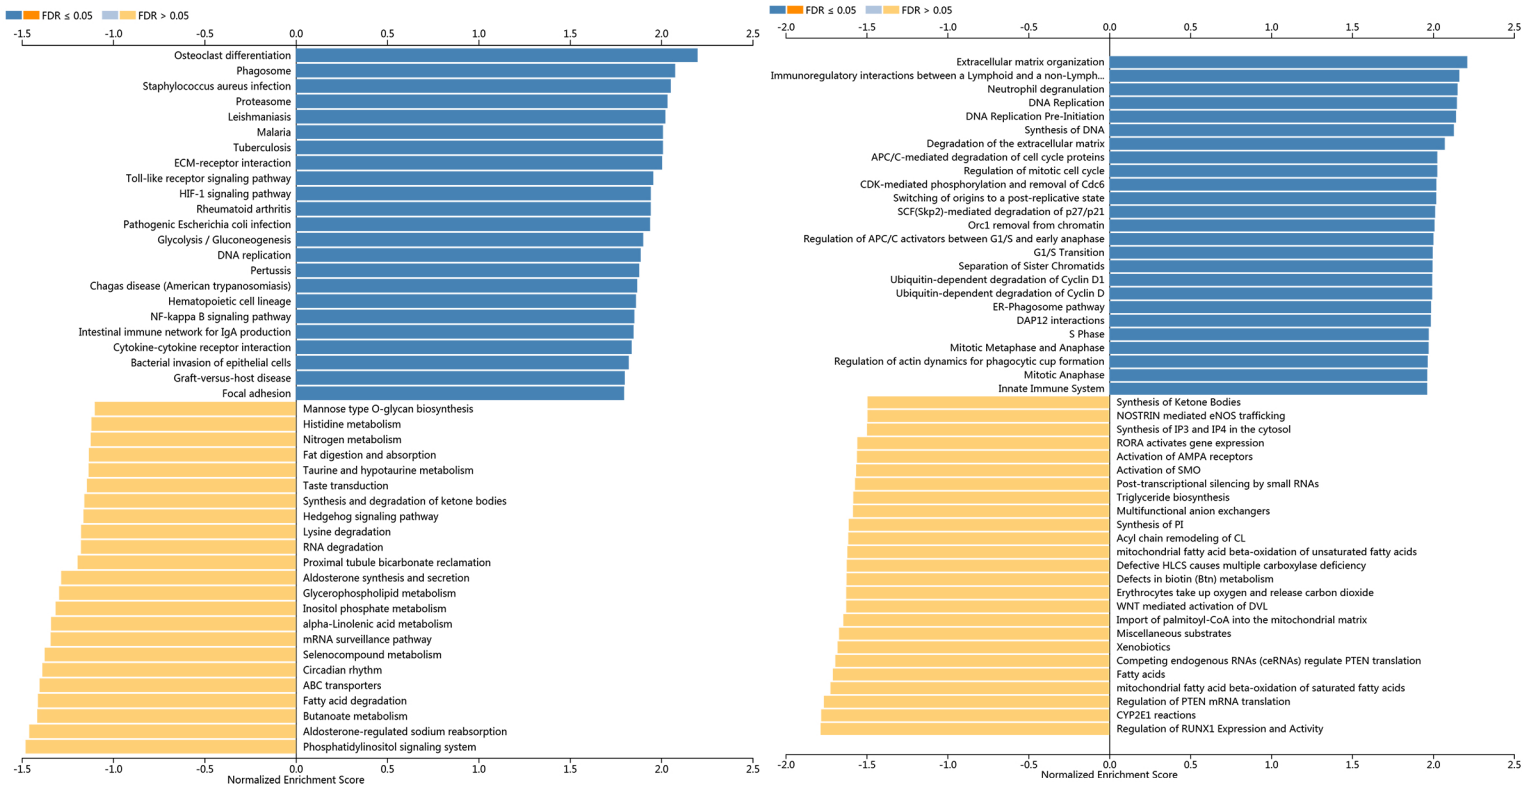

a

b

Supplementary Figure 3

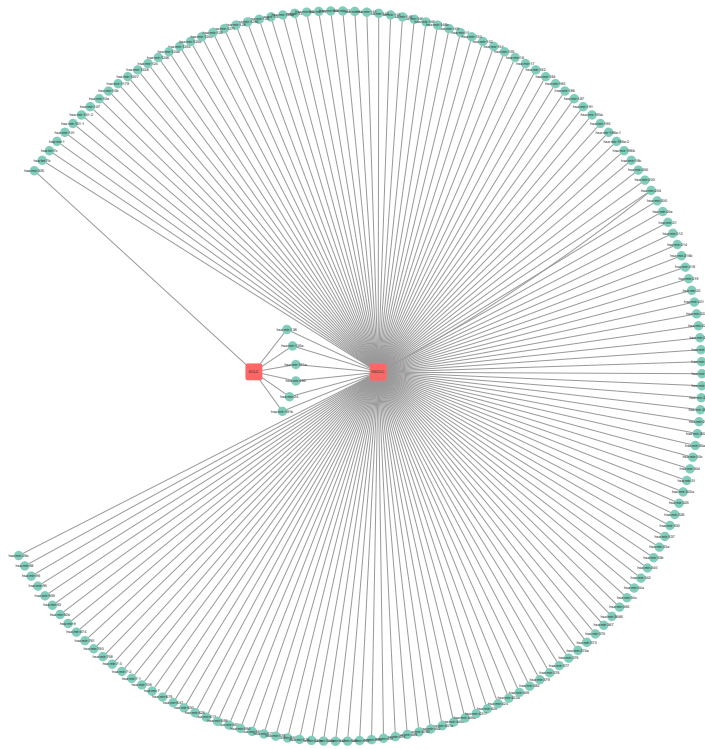

Supplementary Figure 4

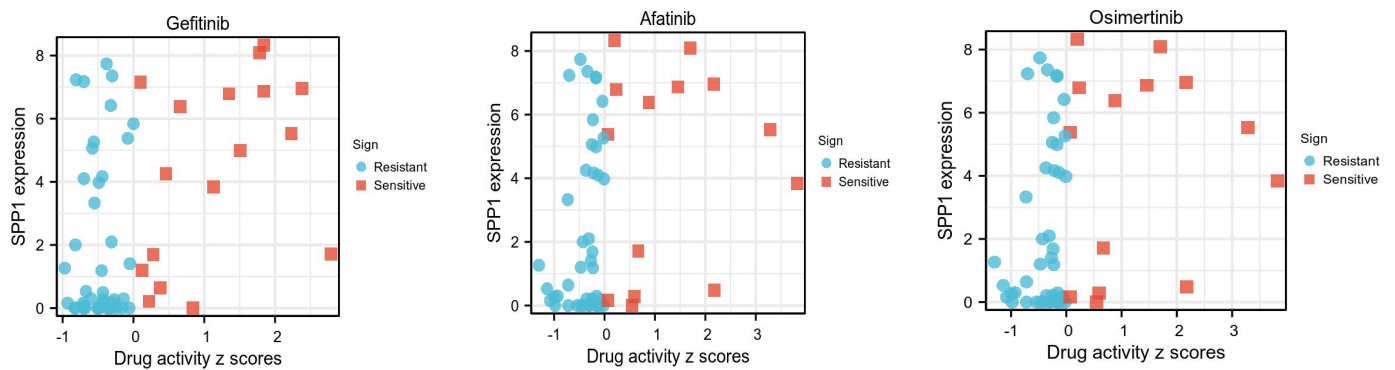

Supplementary Figure 5

Figure legends

Supplementary Figure 1. PPI network of 107 DEGs was constructed in STRING

Supplementary Figure 2. Four key modules extracted by MCODE in Cytoscape

Supplementary Figure 3. KEGG(a) and Reactome(b) pathway enrichment analysis of SPP1 related genes

Supplementary Figure 4. miRNA network of SCLC and NSCLC

Supplementary Figure 5. SPP1 RNA level correlated to the sensitivity of Gefitinib, Afatinib and Osimertinib by Cell Miner
